# Supplementary material
Source: PubMed Central journal article supplement (PMC6233833)
Supplement: jamaophthalmol-136-1098-s001.pdf [file jamaophthalmol-136-1098-s001.pdf]

## Supplementary Online Content

Hiemcke-Jiwa LS, ten Dam-van Loon NH, Leguit RJ, et al. Potential Diagnosis of Vitreoretinal Lymphoma by Detection of *MYD88* Mutation in Aqueous Humor With Ultrasensitive Droplet Digital Polymerase Chain Reaction. *JAMA Ophthalmol*. Published online July 19, 2018. doi:10.1001/jamaophthalmol.2018.2887

**eTable 1.** MYD88 p.(L265P) analysis (ddPCR) in treated VRL patients: all ocular fluids were negative after treatment.

**eTable 2.** Etiology of investigated uveitis patients in this study.

**eTable 3.** Ophthalmological findings and demographics of each of the investigated VRL patients (n=23).

**eTable 4.** Characteristics and test results of each of the investigated VRL patients (n=23).

**eTable 5.** Sensitivity and specificity of MYD88 analysis in VF (upper panel) and AH (lower panel) compared to routine laboratory tests in diagnostic work-up of VRL.

**eFigure 1.** Flow chart of MYD88 p.(L265P) analysis on cell pellet and cfDNA harvested from diluted and non-diluted VF of patients suspected with VRL.

**eFigure 2.** ddPCR results of a MYD88 p.(L265P)-positive diluted VF sample (cfDNA; mutation frequency 48.0%).

**eReferences.**

This supplementary material has been provided by the authors to give readers additional information about their work.

**eTable 1. MYD88 p.(L265P) analysis (ddPCR) in treated VRL patients: all ocular fluids were negative after treatment.**

| ddPCR             | Before treatment |                    | After treatment |        |
|-------------------|------------------|--------------------|-----------------|--------|
|                   | VF(%)            | AH(%)              | VF(%)           | AH(%)  |
| MYD88 p.(L265P) + | 3(60)            | 1(20) <sup>a</sup> | 0(0)            | 0(0)   |
| MYD88 p.(L265P) - | 2(40)            | 4(80)              | 5(100)          | 5(100) |
| Total(samples)    | 5                | 5                  | 5               | 5      |

<sup>a</sup>This AH sample contained 104 wild-type droplets and 47 mutant droplets (mutation frequency 31%).  
Abbreviations: AH: aqueous humor; ddPCR: droplet digital PCR; VF: vitreous fluid; VRL: vitreoretinal lymphoma; +: positive for MYD88 p.(L265P); - negative for MYD88 p.(L265P)

**eTable 2. Etiology of investigated uveitis patients in this study.** Etiology was based upon standard PCR and Goldmann-Witmer coefficient detection of infectious entities<sup>1</sup> and classified according to *the Standardization of Uveitis Nomenclature Working Group*<sup>2</sup>.

| <b>Etiology</b>         | <b>No. of patients (%)<br/>(N=40)</b> |
|-------------------------|---------------------------------------|
| Non-infectious uveitis  | 4(10)                                 |
| Infectious uveitis      | 36 (90)                               |
| -Toxoplasma             | 13(33)                                |
| -Varicella zoster virus | 9(23)                                 |
| -Herpes simplex virus   | 5(13)                                 |
| -Cytomegalovirus        | 4(10)                                 |
| -Rubella                | 4(10)                                 |
| -Candida                | 1(3)                                  |

**eTable 3. Ophthalmological findings and demographics of each of the investigated VRL patients (n=23).**

| Patient | Diagnosis | Available ocular fluid | Sex | Age | Race      | Paired | Treated | Anterior chamber cells | Vitreous cells | Vitreous floaters | Retinal infiltrates                                    |
|---------|-----------|------------------------|-----|-----|-----------|--------|---------|------------------------|----------------|-------------------|--------------------------------------------------------|
| 1       | VRL       | VF; AH                 | F   | 80  | Caucasian | +      |         | 0                      | 4+             | 3+                | Retinal pigment changes                                |
| 2       | VRL       | VF; AH                 | M   | 64  | Caucasian | +      |         | 0                      | 4+             | 3+                | Retinal pigment changes                                |
| 3       | VRL       | VF; AH                 | M   | 67  | Caucasian | +      |         | 0.5                    | 3+             | 1+                | Retinal pigment changes                                |
| 4       | VRL       | VF; AH (OD)            | M   | 65  | Caucasian | +      |         | 2+                     | 4+             | 3+                | -                                                      |
| 4       | VRL       | VF; AH (OS)            | M   | 65  | Caucasian | +      |         | 1+                     | 4+             | 3+                | -                                                      |
| 5       | VRL       | VF; AH                 | M   | 64  | Caucasian | +      |         | 0.5                    | 3+             | 3+                | Retinal pigment changes                                |
| 6       | VRL       | VF; AH                 | M   | 72  | Caucasian | +      |         | 0                      | 1+             | 2+                | Retinal pigment changes                                |
| 7       | VRL       | VF; AH                 | M   | 82  | Caucasian | +      |         | 0.5                    | 2+             | 4+                | Retinal pigment changes                                |
| 8       | VRL       | VF; AH                 | F   | 73  | Caucasian | +      |         | 0                      | 2+             | 2+                | Yellow subretinal infiltrates                          |
| 9       | VRL       | VF; AH                 | F   | 73  | Caucasian | +      |         | 0                      | 4+             | 3+                | Retinal pigment changes                                |
| 10      | VRL       | VF; AH                 | F   | 80  | Caucasian |        | +       | 0                      | 3+             | 3+                | -                                                      |
| 11      | VRL       | VF; AH                 | M   | 76  | Caucasian | +      |         | 0                      | 2+             | 3+                | Retinal pigment changes                                |
| 12      | VRL       | VF; AH                 | M   | 72  | Caucasian |        | +       | 0                      | 2+             | 0                 | Retinal pigment changes                                |
| 13      | VRL       | VF; AH                 | F   | 75  | Asian     |        | +       | 0                      | 2+             | 3+                | Yellow subretinal infiltrates                          |
| 14      | VRL       | VF; AH                 | F   | 77  | Caucasian |        | +       | 2+                     | 2+             | 4+                | Retinal pigment changes/ Yellow subretinal infiltrates |
|         |           |                        |     |     |           |        |         |                        |                |                   |                                                        |

| Patient         | Diagnosis | Available ocular fluid | Sex | Age | Race      | Paired  | Treated | Anterior chamber cells | Vitreous cells                   | Vitreous floaters                | Retinal infiltrates              |
|-----------------|-----------|------------------------|-----|-----|-----------|---------|---------|------------------------|----------------------------------|----------------------------------|----------------------------------|
| 15              | VRL       | VF (OS); AH (OD)       | M   | 71  | Caucasian | Missing | Missing | 0.5;0.5                | 2+;1+                            | 3+;2+                            | -; Yellow subretinal infiltrates |
| 16              | VRL       | VF; AH                 | F   | 63  | Suriname  | +       |         | 0.5                    | 3+                               | 4+                               | Yellow subretinal infiltrates    |
| 17              | VRL       | AH                     | M   | 65  | Caucasian | Missing | Missing | 0.5                    | 2+                               | 3+                               | -                                |
| 18              | VRL       | VF (OD)                | F   | 82  | Caucasian | Missing | Missing | 1+                     | 2-3+                             | 3+                               | Yellow subretinal infiltrates    |
| 18              | VRL       | VF; AH (OS)            | F   | 82  | Caucasian |         | +       | 1+                     | 2-3+                             | 3+                               | Yellow subretinal infiltrates    |
| 19              | VRL       | VF                     | M   | 83  | Caucasian | Missing | Missing | 0                      | 1+                               | 2+                               | -                                |
| 20              | VRL       | VF                     | F   | 79  | Caucasian | Missing | Missing | 4+                     | Not visible due to corneal edema | Not visible due to corneal edema | Not visible due to corneal edema |
| 21 <sup>a</sup> | VRL       | AH (OD)                | M   | 56  | Caucasian | Missing | Missing | 0                      | 0                                | 0                                | Aspecific retinal lesions        |
| 21 <sup>a</sup> | VRL       | AH (OS)                | M   | 56  | Caucasian | Missing | Missing | 0                      | 0                                | 0                                | -                                |
| 21 <sup>a</sup> | VRL       | AH (OD)                | M   | 56  | Caucasian | Missing | Missing | 0                      | 0                                | 0                                | Aspecific retinal lesions        |
| 21 <sup>a</sup> | VRL       | AH (OD)                | M   | 56  | Caucasian | Missing | Missing | 0                      | 0                                | 0                                | Aspecific retinal lesions        |
| 22              | VRL       | AH (OD)                | M   | 66  | Caucasian | Missing | Missing | 0.5                    | 1+                               | 2+                               | -                                |
| 22              | VRL       | AH (OS)                | M   | 66  | Caucasian | Missing | Missing | 0.5                    | 1+                               | 2+                               | -                                |
| 23              | VRL       | AH (OD)                | F   | 75  | Caucasian | Missing | Missing | 0                      | 4+                               | 3+                               | -                                |
| 23              | VRL       | AH (OS)                | F   | 75  | Caucasian | Missing | Missing | 0                      | 4+                               | 3+                               | -                                |

<sup>a</sup>Harvested during (Methotrexate) treatment. Abbreviations: AH: aqueous humor; OD: oculus dextra; OS: oculus sinistra; VF: vitreous fluid; -: no abnormalities detected

**eTable 4. Characteristics and test results of each of the investigated VRL patients (n=23).**

| Patient | Diagnosis | Available ocular fluid | Paired  | Treated | Cytomorphology(VF) | Flow cytometry(VF) | MYD88 p.(L265P)(%FA) |         |
|---------|-----------|------------------------|---------|---------|--------------------|--------------------|----------------------|---------|
|         |           |                        |         |         |                    |                    | VF                   | AH      |
| 1       | VRL       | VF; AH                 | +       |         | Missing            | -                  | + (64)               | + (64)  |
| 2       | VRL       | VF; AH                 | +       |         | +                  | +                  | + (94)               | + (81)  |
| 3       | VRL       | VF; AH                 | +       |         | -                  | +                  | + (97)               | + (68)  |
| 4       | VRL       | VF; AH (OD)            | +       |         | -                  | +                  | -                    | -       |
| 4       | VRL       | VF; AH (OS)            | +       |         | +                  | +                  | -                    | -       |
| 5       | VRL       | VF; AH                 | +       |         | -                  | Missing            | + (97)               | + (97)  |
| 6       | VRL       | VF; AH                 | +       |         | -                  | -                  | -                    | -       |
| 7       | VRL       | VF; AH                 | +       |         | -                  | +                  | + (94)               | + (95)  |
| 8       | VRL       | VF; AH                 | +       |         | -                  | +                  | + (7)                | -       |
| 9       | VRL       | VF; AH                 | +       |         | +                  | +                  | + (79)               | + (81)  |
| 10      | VRL       | VF; AH                 |         | +       | -                  | +                  | -                    | -       |
| 11      | VRL       | VF; AH                 | +       |         | -                  | -                  | + (47)               | + (32)  |
| 12      | VRL       | VF; AH                 |         | +       | -                  | +                  | + (40)               | -       |
| 13      | VRL       | VF; AH                 |         | +       | -                  | Missing            | + (46)               | -       |
| 14      | VRL       | VF; AH                 |         | +       | -                  | -                  | -                    | + (31)  |
| 15      | VRL       | VF (OS); AH (OD)       | Missing | Missing | +                  | -                  | + (33)               | -       |
| 16      | VRL       | VF; AH                 | +       |         | +                  | +                  | + (41)               | + (40)  |
| 17      | VRL       | AH                     | Missing | Missing | Missing            | Missing            | Missing              | -       |
| 18      | VRL       | VF (OD)                | Missing | Missing | +                  | -                  | + (47)               | Missing |
| 18      | VRL       | VF; AH (OS)            |         | +       | -                  | -                  | + (35)               | -       |
| 19      | VRL       | VF                     | Missing | Missing | -                  | Missing            | + (49)               | Missing |
| 20      | VRL       | VF                     | Missing | Missing | -                  | Missing            | + (87)               | Missing |

| 21 <sup>a</sup> | VRL              | AH (OD)                       | Missing       | Missing        | Missing                   | Missing                   | Missing                     | -         |
|-----------------|------------------|-------------------------------|---------------|----------------|---------------------------|---------------------------|-----------------------------|-----------|
| <b>Patient</b>  | <b>Diagnosis</b> | <b>Available ocular fluid</b> | <b>Paired</b> | <b>Treated</b> | <b>Cytomorphology(VF)</b> | <b>Flow cytometry(VF)</b> | <b>MYD88 p.(L265P)(%FA)</b> |           |
|                 |                  |                               |               |                |                           |                           | <b>VF</b>                   | <b>AH</b> |
| 21 <sup>a</sup> | VRL              | AH (OS)                       | Missing       | Missing        | NA                        | Missing                   | Missing                     | -         |
| 21 <sup>a</sup> | VRL              | AH (OD)                       | Missing       | Missing        | NA                        | Missing                   | Missing                     | -         |
| 21 <sup>a</sup> | VRL              | AH (OD)                       | Missing       | Missing        | NA                        | Missing                   | Missing                     | -         |
| 22              | VRL              | AH (OD)                       | Missing       | Missing        | NA                        | Missing                   | Missing                     | -         |
| 22              | VRL              | AH (OS)                       | Missing       | Missing        | -                         | Missing                   | Missing                     | -         |
| 23              | VRL              | AH (OD)                       | Missing       | Missing        | Missing                   | -                         | Missing                     | + (20)    |
| 23              | VRL              | AH (OS)                       | Missing       | Missing        | Missing                   | -                         | Missing                     | + (50)    |

<sup>a</sup>Harvested during (Methotrexate) treatment. Abbreviations: AH: aqueous humor; FA: fractional abundance (e.g. mutation frequency); OD: oculus dextra; OS: oculus sinistra; VF: vitreous fluid; +: positive test result; -: negative test result

**eTable 4. Ophthalmological findings and demographics of each of the investigated VRL patients (n=23).**

| Patient | Diagnosis | Available ocular fluid | Sex | Age | Race      | Paired | Treated | Anterior chamber cells | Vitreous cells | Vitreous floaters | Retinal infiltrates                                    |
|---------|-----------|------------------------|-----|-----|-----------|--------|---------|------------------------|----------------|-------------------|--------------------------------------------------------|
| 1       | VRL       | VF; AH                 | F   | 80  | Caucasian | +      |         | 0                      | 4+             | 3+                | Retinal pigment changes                                |
| 2       | VRL       | VF; AH                 | M   | 64  | Caucasian | +      |         | 0                      | 4+             | 3+                | Retinal pigment changes                                |
| 3       | VRL       | VF; AH                 | M   | 67  | Caucasian | +      |         | 0.5                    | 3+             | 1+                | Retinal pigment changes                                |
| 4       | VRL       | VF; AH (OD)            | M   | 65  | Caucasian | +      |         | 2+                     | 4+             | 3+                | -                                                      |
| 4       | VRL       | VF; AH (OS)            | M   | 65  | Caucasian | +      |         | 1+                     | 4+             | 3+                | -                                                      |
| 5       | VRL       | VF; AH                 | M   | 64  | Caucasian | +      |         | 0.5                    | 3+             | 3+                | Retinal pigment changes                                |
| 6       | VRL       | VF; AH                 | M   | 72  | Caucasian | +      |         | 0                      | 1+             | 2+                | Retinal pigment changes                                |
| 7       | VRL       | VF; AH                 | M   | 82  | Caucasian | +      |         | 0.5                    | 2+             | 4+                | Retinal pigment changes                                |
| 8       | VRL       | VF; AH                 | F   | 73  | Caucasian | +      |         | 0                      | 2+             | 2+                | Yellow subretinal infiltrates                          |
| 9       | VRL       | VF; AH                 | F   | 73  | Caucasian | +      |         | 0                      | 4+             | 3+                | Retinal pigment changes                                |
| 10      | VRL       | VF; AH                 | F   | 80  | Caucasian |        | +       | 0                      | 3+             | 3+                | -                                                      |
| 11      | VRL       | VF; AH                 | M   | 76  | Caucasian | +      |         | 0                      | 2+             | 3+                | Retinal pigment changes                                |
| 12      | VRL       | VF; AH                 | M   | 72  | Caucasian |        | +       | 0                      | 2+             | 0                 | Retinal pigment changes                                |
| 13      | VRL       | VF; AH                 | F   | 75  | Asian     |        | +       | 0                      | 2+             | 3+                | Yellow subretinal infiltrates                          |
| 14      | VRL       | VF; AH                 | F   | 77  | Caucasian |        | +       | 2+                     | 2+             | 4+                | Retinal pigment changes/ Yellow subretinal infiltrates |
|         |           |                        |     |     |           |        |         |                        |                |                   |                                                        |



| Patient         | Diagnosis | Available ocular fluid | Sex | Age | Race      | Paired  | Treated | Anterior chamber cells | Vitreous cells                   | Vitreous floaters                | Retinal infiltrates              |
|-----------------|-----------|------------------------|-----|-----|-----------|---------|---------|------------------------|----------------------------------|----------------------------------|----------------------------------|
| 15              | VRL       | VF (OS); AH (OD)       | M   | 71  | Caucasian | Missing | Missing | 0.5;0.5                | 2+;1+                            | 3+;2+                            | -; Yellow subretinal infiltrates |
| 16              | VRL       | VF; AH                 | F   | 63  | Suriname  | +       |         | 0.5                    | 3+                               | 4+                               | Yellow subretinal infiltrates    |
| 17              | VRL       | AH                     | M   | 65  | Caucasian | Missing | Missing | 0.5                    | 2+                               | 3+                               | -                                |
| 18              | VRL       | VF (OD)                | F   | 82  | Caucasian | Missing | Missing | 1+                     | 2-3+                             | 3+                               | Yellow subretinal infiltrates    |
| 18              | VRL       | VF; AH (OS)            | F   | 82  | Caucasian |         | +       | 1+                     | 2-3+                             | 3+                               | Yellow subretinal infiltrates    |
| 19              | VRL       | VF                     | M   | 83  | Caucasian | Missing | Missing | 0                      | 1+                               | 2+                               | -                                |
| 20              | VRL       | VF                     | F   | 79  | Caucasian | Missing | Missing | 4+                     | Not visible due to corneal edema | Not visible due to corneal edema | Not visible due to corneal edema |
| 21 <sup>a</sup> | VRL       | AH (OD)                | M   | 56  | Caucasian | Missing | Missing | 0                      | 0                                | 0                                | Aspecific retinal lesions        |
| 21 <sup>a</sup> | VRL       | AH (OS)                | M   | 56  | Caucasian | Missing | Missing | 0                      | 0                                | 0                                | -                                |
| 21 <sup>a</sup> | VRL       | AH (OD)                | M   | 56  | Caucasian | Missing | Missing | 0                      | 0                                | 0                                | Aspecific retinal lesions        |
| 21 <sup>a</sup> | VRL       | AH (OD)                | M   | 56  | Caucasian | Missing | Missing | 0                      | 0                                | 0                                | Aspecific retinal lesions        |
| 22              | VRL       | AH (OD)                | M   | 66  | Caucasian | Missing | Missing | 0.5                    | 1+                               | 2+                               | -                                |
| 22              | VRL       | AH (OS)                | M   | 66  | Caucasian | Missing | Missing | 0.5                    | 1+                               | 2+                               | -                                |
| 23              | VRL       | AH (OD)                | F   | 75  | Caucasian | Missing | Missing | 0                      | 4+                               | 3+                               | -                                |
| 23              | VRL       | AH (OS)                | F   | 75  | Caucasian | Missing | Missing | 0                      | 4+                               | 3+                               | -                                |

<sup>a</sup>Harvested during (Methotrexate) treatment. Abbreviations: AH: aqueous humor; OD: oculus dextra; OS: oculus sinistra; VF: vitreous fluid; -: no abnormalities detected

**eTable 5. Sensitivity and specificity of *MYD88* analysis in VF (upper panel) and AH (lower panel) compared to routine laboratory tests in diagnostic work-up of VRL.**

|                       | Sensitivity [95%CI] |                       | Specificity [95%CI] |                       |
|-----------------------|---------------------|-----------------------|---------------------|-----------------------|
|                       | Variable(%)         | <i>MYD88</i> in VF(%) | Variable(%)         | <i>MYD88</i> in VF(%) |
| <b>Cytomorphology</b> | 30.0[10.0-50.0]     | 75.0[55.0-90.0]       | 100.0%[62.9-100.0]  | 100.0%[62.9-100.0]    |
| <b>Flow cytometry</b> | 58.8[35.3-82.4]     | 70.6[47.1-88.2]       | 100.0%[70.0-100.0]  | 100.0%[70.0-100.0]    |
|                       | Variable(%)         | <i>MYD88</i> in AH(%) | Variable(%)         | <i>MYD88</i> in AH(%) |
| <b>Cytomorphology</b> | 33.3[8.3-58.3]      | 58.3[33.3-83.3]       | 100.0%[5.5-100.0]   | 100.0%[5.5-100.0]     |
| <b>Flow cytometry</b> | 61.5[30.8-84.6]     | 69.2[46.2-92.3]       | 100.0%[20.0-100.0]  | 100.0%[20.0-100.0]    |

N=20 and n=18 patients for cytomorphology and flow cytometry on VF; n=18 patients for cytomorphology and flow cytometry on AH. Since cytomorphology and flow cytometry are (usually) not performed on AH samples, the performance of *MYD88* analysis in AH was compared to simultaneous evaluation of VF by these tests (lower panel). Abbreviations: AH: aqueous humor; VF: vitreous fluid

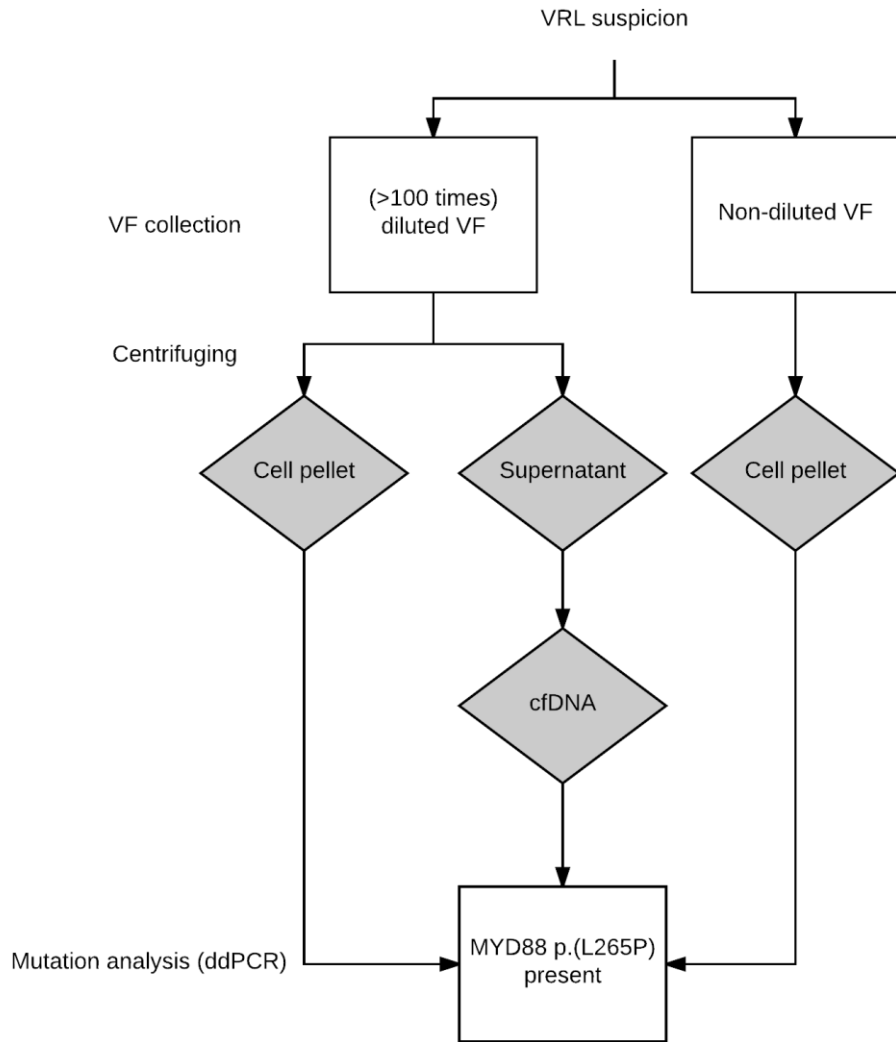

**eFigure 1. Flow chart of MYD88 p.(L265P) analysis on cell pellet and cfDNA harvested from diluted and non-diluted VF of patients suspected with VRL.** MYD88 p.(L265P) was detected in the cell pellet (diluted and non-diluted VF) as well as the cfDNA (diluted VF) from all patients. Abbreviations: cfDNA: cell-free DNA; ddPCR: droplet digital PCR; VF: vitreous fluid; VRL: vitreoretinal lymphoma

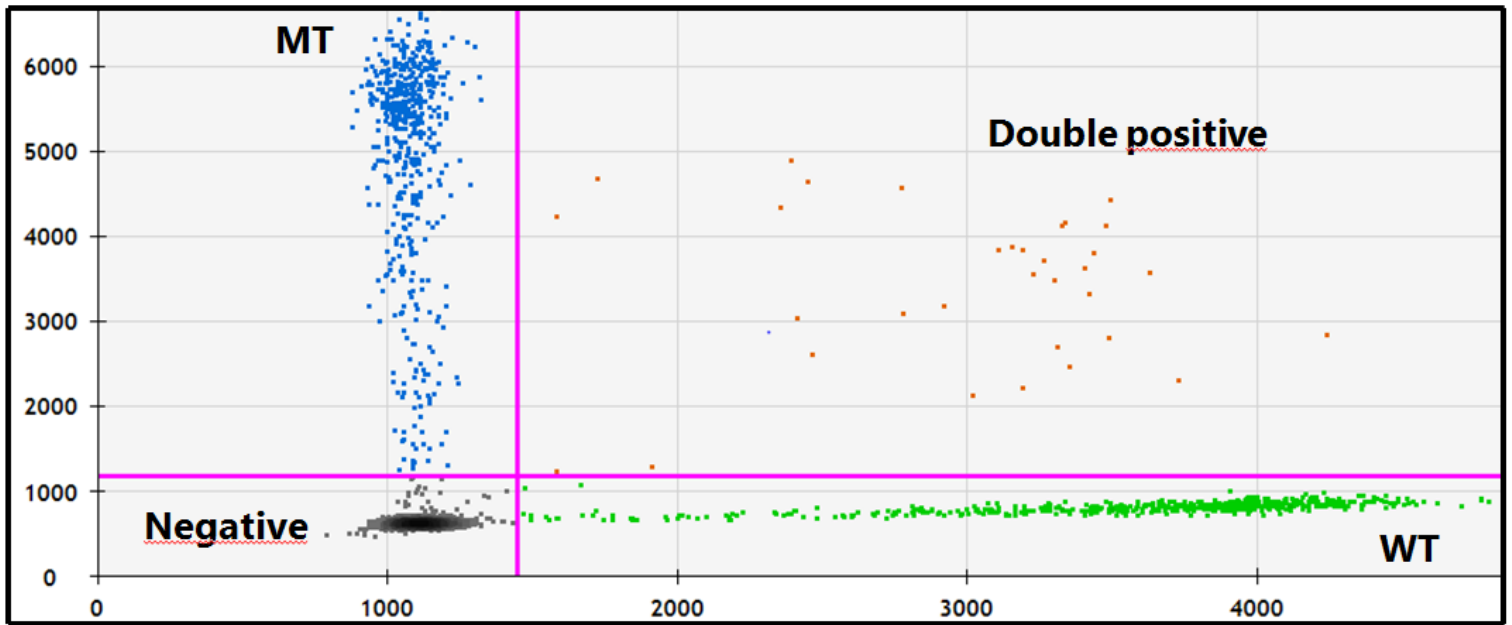

**eFigure 2. ddPCR results of a MYD88 p.(L265P)-positive diluted VF sample (cfDNA; mutation frequency 48.0%).** Wild-type (WT) droplets are depicted in green, mutant droplets (MT) in blue, double positive droplets (both WT and MT DNA) in orange and negative droplets in gray.

## References

1. De Groot-Mijnes JD, Rothova A, Van Loon AM, et al. Polymerase chain reaction and Goldmann-Witmer coefficient analysis are complimentary for the diagnosis of infectious uveitis. *American journal of ophthalmology*. 2006;141(2):313-318.
2. Jabs DA, Nussenblatt RB, Rosenbaum JT. Standardization of uveitis nomenclature for reporting clinical data. Results of the First International Workshop. *American journal of ophthalmology*. 2005;140(3):509-516.
